# Supplementary material
Source: PubMed Central journal article supplement (PMC6342476)
Supplement: NIHMS998199-supplement-Supplement.pdf [file NIHMS998199-supplement-Supplement.pdf]

## Supplementary Online Content

Chaiyachati KH, Qi M, Werner RM. Changes to racial disparities in readmission rates after Medicare's Hospital Readmissions Reduction Program within safety-net and non-safety-net hospitals. *JAMA Netw Open*. 2018;1(7):e184154. doi:10.1001/jamanetworkopen.2018.4154

**eTable 1.** Characteristics of Hospital Discharges Among Medicare Beneficiaries Discharged Between 2007-2015 Under Medicare's Hospital Readmissions Reduction Program (HRRP) and Characteristics of the Discharging Hospitals, by Study Periods

**eTable 2.** Risk-Adjusted Trends, Differences in Trends Between Black and White Patients by Periods and Difference-in-Differences in Trends Between Periods, by Hospitals' Safety-Net Status Among the HRRP Targeted Conditions

**eTable 3.** Risk-Adjusted Trends, Differences in Trends Between Black and White Patients by Periods and Difference-in-Differences in Trends Between Periods, by Hospitals' Safety-Net Status Among Conditions Not Targeted by the HRRP

This supplementary material has been provided by the authors to give readers additional information about their work.

**eTable 1.** Characteristics of Hospital Discharges Among Medicare Beneficiaries Discharged Between 2007-2015 Under Medicare's Hospital Readmissions Reduction Program (HRRP) and Characteristics of the Discharging Hospitals, by Study Periods

| Characteristics                      | Pre-ACA           | HRRP implementation | HRRP penalty      |
|--------------------------------------|-------------------|---------------------|-------------------|
| Patient characteristics              |                   |                     |                   |
| Discharges, No.                      | 23,348,877        | 16,616,892          | 18,271,287        |
| Discharge location, No. (%)          |                   |                     |                   |
| Safety-net                           | 4,477,502 (19.2)  | 3,207,257 (19.3)    | 3,552,483 (19.4)  |
| Non-safety-net                       | 18,871,375 (80.8) | 13,409,635 (80.7)   | 14,718,804 (80.6) |
| Reason for admission, No. (%)        |                   |                     |                   |
| Targeted condition                   | 3,205,034 (13.7)  | 2,181,492 (13.1)    | 2,477,724 (13.6)  |
| Non-targeted condition               | 2,0143,843 (86.3) | 14,435,400 (86.9)   | 15,793,563 (86.4) |
| Black, No. (%)                       | 2,254,110 (9.7)   | 1,648,623 (9.9)     | 1,825,584 (10.0)  |
| Female, No. (%)                      | 13,548,867 (58.0) | 9,599,375 (57.8)    | 10,434,375 (57.1) |
| Dual-eligible, No. (%)               | 3,931,929 (16.8)  | 2,842,509 (17.1)    | 3,026,003 (16.6)  |
| Age, mean (sd)                       | 78.7 (7.7)        | 78.8 (8.0)          | 78.8 (8.1)        |
| Hospital characteristics             |                   |                     |                   |
| No. of hospitals                     | 3,703             | 3,527               | 3,441             |
| Safety-net hospital, No. (%)         | 817 (22.1)        | 787 (22.3)          | 771 (22.4)        |
| Hospital bed size, mean (sd)         | 214 (211)         | 220 (219)           | 225 (224)         |
| Profit status <sup>a</sup> , No. (%) |                   |                     |                   |
| For profit                           | 908 (24.5)        | 837 (23.7)          | 824 (23.9)        |
| Nonprofit                            | 1,751 (47.3)      | 1,683 (47.7)        | 1,736 (50.5)      |
| Public                               | 427 (11.5)        | 355 (10.1)          | 328 (9.5)         |
| Other                                | 1,100 (29.7)      | 930 (26.4)          | 884 (25.7)        |
| Teaching hospital, No. (%)           | 831 (22.4)        | 801 (22.7)          | 825 (24.0)        |
| Rural hospital, No. (%)              | 1,028 (27.8)      | 981 (27.8)          | 947 (27.5)        |
| Geographic region, No. (%)           |                   |                     |                   |
| Northeast                            | 580 (15.7)        | 544 (15.4)          | 522 (15.2)        |
| Midwest                              | 823 (22.2)        | 794 (22.5)          | 785 (22.8)        |
| South                                | 1,588 (42.9)      | 1,526 (43.3)        | 1,487 (43.2)      |
| West                                 | 712 (19.2)        | 663 (18.8)          | 647 (18.8)        |

Note: The Pre-ACA period began on January 1, 2007 and ended on March 31, 2010. The implementation period began on April 1, 2010 and ended on September 30, 2012. The HRRP penalty period began on October 1, 2012 and ended on September 30, 2015.

ACA = Affordable Care Act; HRRP = Hospital Readmissions Reduction Program

**eTable 2.** Risk-Adjusted Trends, Differences in Trends Between Black And White Patients by Time Periods and Difference-in-Differences in Trends Between Time Periods, by Hospitals' Safety-Net Status Among the HRRP Targeted Conditions<sup>a</sup>

| Clinical conditions                                      | Safety-net hospitals<br>[n=11,237,242 discharges] |                |                           |         | Non-safety-net hospitals<br>[n=46,999,814 discharges] |                |                           |         |
|----------------------------------------------------------|---------------------------------------------------|----------------|---------------------------|---------|-------------------------------------------------------|----------------|---------------------------|---------|
|                                                          | White Patients                                    | Black Patients | Difference (95% CI)       | P value | White Patients                                        | Black Patients | Difference (95% CI)       | P value |
| <b>HRRP-targeted conditions [n=7,864,250]</b>            |                                                   |                |                           |         |                                                       |                |                           |         |
| Time periods                                             |                                                   |                |                           |         |                                                       |                |                           |         |
| Pre-ACA                                                  | -0.04                                             | +0.02          | +0.06<br>(-0.01 to +0.13) | 0.08    | -0.02                                                 | +0.01          | +0.03<br>(-0.01 to +0.07) | 0.18    |
| HRRP implementation                                      | -0.20                                             | -0.34          | -0.14<br>(-0.22 to -0.06) | <0.01   | -0.21                                                 | -0.30          | -0.08<br>(-0.13 to -0.03) | <0.01   |
| HRRP penalty                                             | -0.01                                             | +0.01          | +0.01<br>(-0.07 to +0.10) | 0.74    | -0.02                                                 | +0.01          | +0.03<br>(-0.02 to +0.08) | 0.25    |
| Time period comparisons<br>("difference-in-differences") |                                                   |                |                           |         |                                                       |                |                           |         |
| Pre-ACA vs. HRRP implementation                          |                                                   |                | -0.21<br>(-0.34 to -0.07) | <0.01   |                                                       |                | -0.11<br>(-0.19 to -0.03) | <0.01   |
| HRRP implementation vs. HRRP penalty                     |                                                   |                | +0.16<br>(+0.01 to +0.30) | 0.03    |                                                       |                | +0.11<br>(+0.02 to +0.20) | 0.01    |
| HRRP penalty vs. pre-ACA                                 |                                                   |                | -0.05<br>(-0.15 to +0.05) | 0.34    |                                                       |                | 0.00<br>(-0.06 to +0.06)  | 0.94    |

Note: HRRP-targeted conditions included acute myocardial infarction, heart failure, and pneumonia. The Pre-ACA period began on January 1, 2007 and ended on March 31, 2010. The implementation period began on April 1, 2010 and ended on September 30, 2012. The HRRP penalty period began on October 1, 2012 and ended on September 30, 2015.

<sup>a</sup> All estimates were adjusted for patient characteristics (i.e., age, sex, 30 comorbidities defined by Medicare's hospital readmission risk adjustment, and Medicare/Medicaid dual-eligible status), hospital characteristics (i.e., number of beds, profit status, teaching hospital status as indicated by having an allopathic or osteopathic residency program, rural location of hospital, and Census-designated region), and incorporated hospital fixed effects.

ACA = Affordable Care Act; HRRP = Hospital Readmissions Reduction Program.

**eTable 3.** Risk-Adjusted Trends, Differences in Trends Between Black and White Patients by Time Periods and Difference-in-Differences in Trends Between Time Periods, by Hospitals' Safety-Net Status Among Conditions Not Targeted by the HRRP<sup>a</sup>

| Clinical conditions                                      | Safety-net hospitals<br>[n=11,237,242 discharges] |                |                           |         | Non-safety-net hospitals<br>[n=46,999,814 discharges] |                |                           |         |
|----------------------------------------------------------|---------------------------------------------------|----------------|---------------------------|---------|-------------------------------------------------------|----------------|---------------------------|---------|
|                                                          | White Patients                                    | Black Patients | Difference (95% CI)       | P value | White Patients                                        | Black Patients | Difference (95% CI)       | P value |
| <b>Non-targeted conditions [n=50,372,806]</b>            |                                                   |                |                           |         |                                                       |                |                           |         |
| Time periods                                             |                                                   |                |                           |         |                                                       |                |                           |         |
| Pre-ACA                                                  | -0.02                                             | 0.00           | +0.01<br>(-0.01 to +0.04) | 0.40    | -0.02                                                 | -0.02          | +0.01<br>(-0.01 to +0.02) | 0.36    |
| HRRP implementation                                      | -0.13                                             | -0.23          | -0.10<br>(-0.13 to -0.06) | <0.001  | -0.13                                                 | -0.17          | -0.04<br>(-0.06 to -0.02) | <0.001  |
| HRRP penalty                                             | -0.01                                             | +0.04          | +0.05<br>(+0.01 to +0.08) | <0.01   | 0.00                                                  | 0.00           | 0.00<br>(-0.01 to +0.02)  | 0.81    |
| Time period comparisons<br>("difference-in-differences") |                                                   |                |                           |         |                                                       |                |                           |         |
| Pre-ACA vs. HRRP implementation                          |                                                   |                | -0.11<br>(-0.16 to -0.06) | <0.001  |                                                       |                | -0.05<br>(-0.08 to -0.02) | <0.01   |
| HRRP implementation vs. HRRP penalty                     |                                                   |                | +0.14<br>(+0.09 to +0.20) | <0.001  |                                                       |                | +0.04<br>(+0.01 to +0.08) | 0.02    |
| HRRP penalty vs. pre-ACA                                 |                                                   |                | +0.03<br>(0.00 to +0.07)  | 0.08    |                                                       |                | +0.01<br>(-0.03 to +0.02) | 0.67    |

Note: Non-targeted conditions included any condition other than acute myocardial infarction, heart failure, and pneumonia. The Pre-ACA period began on January 1, 2007 and ended on March 31, 2010. The implementation period began on April 1, 2010 and ended on September 30, 2012. The HRRP penalty period began on October 1, 2012 and ended on September 30, 2015.

<sup>a</sup> All estimates were adjusted for patient characteristics (i.e., age, sex, 30 comorbidities defined by Medicare's hospital readmission risk adjustment, and Medicare/Medicaid dual-eligible status), hospital characteristics (i.e., number of beds, profit status, teaching hospital status as indicated by having an allopathic or osteopathic residency program, rural location of hospital, and Census-designated region), and incorporated hospital fixed effects.

ACA = Affordable Care Act; HRRP = Hospital Readmissions Reduction Program.
